# Supplementary material for: Characterization of bovine miRNAs by sequencing and bioinformatics analysis
Source: PubMed Central journal article supplement (PMC2761914; doi:10.1186/1471-2199-10-90), 2009-09-16
Supplement: 1471-2199-10-90-S1.pdf [file 1471-2199-10-90-S1.pdf]

**Table S1. Description of 11 Small RNA libraries from bovine tissues**

| Small RNA<br>Sequence type                | Brain |      |      | Muscle | Subcutaneous Fat |      |      | Liv  | Kid  | Immune-related |      | Total |
|-------------------------------------------|-------|------|------|--------|------------------|------|------|------|------|----------------|------|-------|
|                                           | Cer   | Hyp  | Med  | LDM    | Asf              | Bsf  | Rsf  |      |      | Spl            | Thy  |       |
| miRNA                                     | 1117  | 925  | 1087 | 979    | 1318             | 1156 | 1351 | 1316 | 1162 | 1102           | 1243 | 12756 |
| miRNA not mapped to bovine genome         | 2     | 1    | 0    | 1      | 1                | 0    | 0    | 1    | 0    | 0              | 5    | 11    |
| novel miRNA candidates                    | 6     | 8    | 6    | 1      | 10               | 5    | 13   | 16   | 8    | 6              | 23   | 102   |
| piRNA                                     | 0     | 1    | 2    | 0      | 1                | 1    | 0    | 0    | 0    | 3              | 3    | 11    |
| miscRNA                                   | 0     | 0    | 0    | 0      | 0                | 0    | 0    | 0    | 0    | 0              | 1    | 1     |
| sn/sno-RNA                                | 0     | 0    | 0    | 0      | 0                | 0    | 0    | 0    | 0    | 0              | 0    | 0     |
| rRNA                                      | 24    | 32   | 102  | 41     | 27               | 33   | 11   | 48   | 38   | 38             | 12   | 406   |
| tRNA                                      | 7     | 13   | 20   | 7      | 4                | 7    | 1    | 6    | 5    | 7              | 9    | 86    |
| mRNA                                      | 2     | 11   | 3    | 8      | 8                | 4    | 4    | 4    | 10   | 16             | 12   | 82    |
| not annotated-mapped to bovine genome     | 2     | 3    | 6    | 2      | 1                | 2    | 4    | 2    | 3    | 7              | 1    | 33    |
| not annotated-not mapped to bovine genome | 2     | 6    | 6    | 4      | 5                | 4    | 4    | 3    | 5    | 13             | 1    | 53    |
| Overall squences                          | 1162  | 1000 | 1232 | 1043   | 1375             | 1212 | 1388 | 1396 | 1231 | 1192           | 1310 | 13541 |
| <b>Other information</b>                  |       |      |      |        |                  |      |      |      |      |                |      |       |
| enriched small RNA used (ug)              | 25    | 20   | 20   | 40     | 18               | 16   | 20   | 30   | 30   | 30             | 30   |       |
| clones sequenced                          | 816   | 1032 | 1200 | 1920   | 1200             | 1008 | 1152 | 720  | 912  | 960            | 960  | 11880 |
| clones contained small RNAs               | 527   | 518  | 693  | 757    | 681              | 556  | 666  | 536  | 567  | 493            | 558  | 6552  |
| unique sequences                          | 279   | 235  | 248  | 235    | 267              | 193  | 229  | 253  | 313  | 334            | 319  | 1420  |

miRNAs include reported bovine miRNAs and orthologs of known miRNAs from other mammalian species.

Tissues used for libraries construction: abdominal subcutaneous fat (Asf); back subcutaneous fat (Bsf); rump subcutaneous fat (Rsf); cerebellum (Cer); hypothalamus (Hyp); medulla (Med); longissimus dorsi muscle (LDM); kidney (Kid); liver (Liv); spleen (Spl); thymus (Thy).
