# Supplementary material for: Characterization of bovine miRNAs by sequencing and bioinformatics analysis
Source: PubMed Central journal article supplement (PMC2761914; doi:10.1186/1471-2199-10-90), 2009-09-16
Supplement: 1471-2199-10-90-S4.pdf [file 1471-2199-10-90-S4.pdf]

14

```
>bta-un14 [-] chr1:65888797-65888892
augagaaaaccuguucucuuGAGAGAUCAGAGGCGCAGAGUgcgucaaugucaaugaagccugugccuuuuaccucuuaagagcgcacgguuuc
....(.(((((((.((((((((...(((((((...(((((.....)))))))))....))))))....)))))). (-36.30)
>hsa; NC_000003; chr3:119803502-119803407
augagaaaaccuguucucuuGAGAGAUCAGAGGCGCAGAGUgcgucaaugucaaugaagccugugccuuuuacuucuuuaagagcguacgguuuc
....(((.((((..(((((((...(((((((...(((((.....)))))))))....))))))....)))))). (-31.90)
>cfa; NC_006615; chr33:26689455-26689359
augagaaaaccuguucucuuGAGAGAUCAGAGGCGCAGAGUgcgucaaugucaaugaagccugugccuuuuaccucuuaagagcgcacgguuuc
.....(((((((.((((((((...(((((((...(((((.....)))))))))....))))))....)))))).. (-35.70)
>eca; NC_009167; chr19: 38814104-38814199
augagacaaccuguucucuuGAGAGAUCAGAGGCGCAGAGUgcgucaaugucaugaagccugugccuuuuaccucuuaagagcgcacgguuuc
....(.(((((((.((((((((...(((((((...(((((.....)))))))))....))))))....)))))). (-36.30)
```

15

```
>bta-un15 [+] chr1:76369833-76369930
cgucgcagggacccgpgcaguccggucccgggugucuccggcuguugaugccgpcGCGGCCCGGGCUCGGAUGCUCggcgcucugcccuggcagcg
.(((((((...(((((.....)))))))))....))))))....)))))). (-51.20)
```

16

```
>bta-un16 [+] chr26:31723009-31723105
cuauuaacaaggacaccaguuaggccacucagaguuaacuaucaguuaacuaacuggUUACUCUGAGUAACCUAACUGguauccuuguuuuuagucauc
(((.((((((((.((((((((...(((((((...(((((.....)))))))))....))))))....))))))....)))))). (-54.00)
```

17

```
>bta-un17-1 [+] chrX:18300090-18300185
cuacucauuccaguauucuuGGACUUCUUGGUAGCUCAGaugguuaaagaauccaccugcagugcggaagaucuggguucaauccuggguuggga
...(((((((...(((((((...(((((((...(((((((...(((((.....)))))))))....))))))....)))))). (-29.60)
>bta-un17-2 [-] chrX:82012934-82013029
acuuccuauuccuggggauGGACUUCUUGGUAGCUCAGaugguuaaagcugcugccugcaaugcaggagaccugguucgauccuggggucagga
...(((((((...(((((.....)))))))))....))))))....))))))....)))))). (-41.80)
```

18

```
>bta-un18 [+] chr21:66028337-66028433
uccgugauaggggaguggauGGUUGAUCAGAGAACAUAUAUuugucaaugaugucaacugaucacaguccuuccuauccagucacuucuc
...(((((((...(((((((...(((((((...(((((((...(((((.....)))))))))....))))))....)))))). (-40.00)
>hsa; NC_000014; chr14:101518341-101518436
uccaugauaggggauggauGGUUGAUCAGAGAACAUAUAUuuuaaaaugguguaugucaguugaucacaguccuaccuauccagugacuucu
..(((((((...(((((((...(((((((...(((((((...(((((.....)))))))))....))))))....)))))). (-30.70)
```



22

>bta-un22 [+] chr11:102046747-102046842  
gcuggccuuugagcucacugcggggugggcauggcuaagggauccuggaacccUCCGCCUUGUGCUUCCUGCAgauccugcaccgggacaugaa  
(((.....)))...(((((((.....(((((((.....((((.....)))))))))...))))))..((((.....)))..... (-38.00)

23

>bta-un23 [-] chr1:3473974-3474069  
ggauuuaguauuggguuggcUGAAAAGUUCGUUCGGGUUUUuccauaagaacucaaaauaacuuuuuggccaaccaguaauaacacugaugcacc  
....(((.....(((((((.....(((((((.....((((.....)))))))))...))))))..((((.....)))..... (-39.80)

24

>bta-un24-1 [-] chr21:55700328-55700424  
cuucgaucuuugucauggugUGCGGGAUCUUUAGUUGUGGUGugcaaacucucaguugcagcuugugggauccaguuccaugaccaaggauuggacc  
..(((((((.....(((((((.....((((.....)))))))))...))))))..((((.....)))..... (-36.50)

>bta-un24-2 [-] chr25:35972410-35972506  
aaacagccgacguugcggcaUGCGGGAUCUUUAGUUGUGGUGugugaaauucuuaguugcagcaacuaaagaucuccucagggcugcaaugaagaucaga  
.....(((((((.....(((((((.....((((.....)))))))))...))))))..((((.....)))..... (-42.50)

25

>bta-un25 [-] chr7:5546135-5546232  
gcaaggugucggggugggggUGGGGGGAGGCCACCAUGUCAcugcagggcuccucgcugacuggguuggccccaucccaggucggguuccuguggcu  
.....((((.....(((((((.....(((((((.....((((.....)))))))))...))))))..((((.....)))..... (-41.00)

26

>bta-un26-1 [-] chr10:66855635-66855731  
auagugguuaguacucugcgUUGUGGCCGCAGCAACCUCGGUucgaauccgagucacggcauuguggcaacaauaggcacggcaggggugcuuuuuu  
.....(((((((.....(((((((.....((((.....)))))))))...))))))..((((.....)))..... (-30.30)

>bta-un26-2 [+] chr10:66857949-66858045  
auagugguuaguacucugcgUUGUGGCCGCAGCAACCUCGGUucgaauccgagucacggcauuguggcaacaauaggcacggcaagggaccucuacu  
..((((.....(((((((.....(((((((.....((((.....)))))))))...))))))..((((.....)))..... (-33.70)

>hsa; NC\_000015; chr15:45493360-45493451  
auagugguuaguacucugcgUUGUGGCCGCAGCAACCUCGGUucgaauccgagucacggcauuguggaaacaauaggcacggcaagggccucu  
..((((.....(((((((.....(((((((.....((((.....)))))))))...))))))..((((.....)))..... (-27.90)

>hsa; NC\_000015; chr15:45490864-45490778  
auagugguuaguacucugcgUUGUGGCCGCAGCAACCUCGGUucgaauccgagucacggcauugugggaacaauaggcacggcaaggg  
.....((((.....(((((((.....(((((((.....((((.....)))))))))...))))))..((((.....)))..... (-23.30)

>mmu; NC\_000068; chr2:122203715-122203810  
auagugguuaguacucugcgUUGUGGCCGAGCAACCUCGGUucgaauccgagucacggcauuguggcaacaugguacggcaagggcgccuuu  
.....(((((((((.....(((((((((.....((((((.....)))))).....)))))).....)))))).....)).....))..... (-30.60)

>mmu; NC\_000068; chr2:122201290-122201204;122203159-122203073  
auagugguuaguacucugcgUUGUGGCCGAGCAACCUCGGUucgaauccgagucacggcauuguggcaacauggcagggcaaggg  
.....(((.....(((((((((.....((((((.....)))))).....)))))).....)))))).....))..... (-26.30)

>rno; NC\_005102; chr3:109164053-109164148  
auagugguuaguacucugcgUUGUGGCCGAGCAACCUCGGUucgaauccgagucacggcauuguggcaacauggcagggcaagggcgccuuuuu  
..((((.....(((((((((.....((((((.....)))))).....)))))).....)))))).....)).....))..... (-29.70)

>rno; NC\_005102; chr3:10916954-109169459; 109171051-109170965; 109413554-109413640  
auagugguuaguacucugcgUUGUGGCCGAGCAACCUCGGUucgaauccgagucacggcauuguggcaacauggcagggcaaggg  
.....((((.....(((((((((.....((((((.....)))))).....)))))).....)))))).....))..... (-26.30)

>cfa; NC\_006612; chr30:14607221-14607135; 14609442-14609528  
auagugguuaguacucugcgUUGUGGCCGAGCAACCUCGGUucgaauccgagucacggcauugugggaacauggcagggcaaggg  
.....(((.....(((((((((.....((((((.....)))))).....)))))).....)))))).....))..... (-23.30)

>eca; NC\_009144; chr1:144233980-144233885  
auagugguuaguacucugcgUUGUGGCCGAGCAACCUCGGUucgaauccgagucacggcauugugggaacauggcagggcaagggcgccuuuuu  
.....((((.....(((((((((.....((((((.....)))))).....)))))).....)))))).....))..... (-26.10)

27

>bta-un27-1 [-] chr12:14082778-14082867  
cgucgucuccacauggucagcgguuaggauuccugguuuuacaccaggcgcccgggUUCGACUCCCGGUGUGGGAACgccaccaccu  
.((((.....(((((((((.....((((((.....)))))).....)))))).....)))))).....))..... (-29.20)

>bta-un27-2 [+] chrUn.004.4221:9612-9703  
cgucgucuccacauggucagcgguuaggauuccugguuuuacaccaggcgcccgggUUCGACUCCCGGUGUGGGAACgccaccaccuuu  
.((((.....(((((((((.....((((((.....)))))).....)))))).....)))))).....))..... (-29.20)

>hsa; NC\_000013; chr13:45492137-45492058  
cgucuccacauggucagcgguuaggauuccugguuuuacaccaggcgcccgggUUCGACUCCCGGUGUGGGAACgcc  
(((.....(((((((((.....((((((.....)))))).....)))))).....)))))).....))..... (-28.90)

>hsa; NC\_000013; chr15:26327458-26327368  
gucaucuccacauggucagcgguuaggauuccugguuuuacaccaggcgcccgggUUCGACUCCCGGUGUGGGAACgacuggaccuuu  
((((.....(((((((((.....((((((.....)))))).....)))))).....)))))).....))..... (-32.90)

>mmu; NC\_000080; chr14:76552575-76552657  
gucgucuccacauggucagcgguuaggauuccugguuuuacaccaggcgcccgggUUCGACUCCCGGUGUGGGAACgcc  
..((((.....(((((((((.....((((((.....)))))).....)))))).....)))))).....))..... (-29.00)

>mmu; NC\_000075; chr9:104311068-104310996  
ucccacauggucagcgguuaggauuccugguuuuacaccaggcgcccgggUUCGACUCCCGGUGUGGGAAC  
((((.....(((((((((.....((((((.....)))))).....)))))).....)))))).....))..... (-27.10)

>mmu; NC\_000073; chr7:65654685-65654757  
ucccacauggucagcgguuaggauuccugguuuuacaccaggcgcccgggUUCGACUCCCGGUGUGGGAAC  
((((.....(((((((((.....((((((.....)))))).....)))))).....)))))).....))..... (-27.10)



```

>rno; NC_005114; chr15:57083842-57083924
gucgucucccacaugggucuagcgguuaggauuccugguuuucacccaggcggcccgggUUCGACUCCCGGUGUGGGAACgcca
..(((.(((((((((((.(((..((...(((.....))))))...))..))))..))))..))))..))))..))))..))... (-29.00)
>rno; NC_005114; chr15: 61543594-61543666
ucccauaugggucuagcgguuaggauuccugguuuucacccaggcggcccgggUUCGACUCCCGGUAUGGGAAC
(((((((((((((((.(((..((...(((.....))))))...))..))))..))))..))))..))))..))... (-25.20)
>cfa; NC_006604; chr22:9049413-9049496
cgucgucucccacaugggucuagcgguuaggauuccugguuuucacccaggcggcccgggUUCGACUCCCGGUGUGGGAACgcca
.(.(((.(((((((((((.(((..((...(((.....))))))...))..))))..))))..))))..))))..))... (-29.20)
>cfa; NC_006585; chr3:37423794-37423874
gucgccucccauaugggucuagcgguuaggauuccugguuuucacccaggcggcccgggUUCGACUCCCGGUGUGGGAUgac
...(((.(((((((((((.(((..((...(((.....))))))...))..))))..))))..))))..))))..))... (-25.60)
>eca; NC_009160; chr17:25605879-25605959
gucgucucccacaugggucuagcgguuaggauuccugguuuucacccaggcggcccgggUUCGACUCCCGGUGUGGGAACgac
..(((.(((((((((((.(((..((...(((.....))))))...))..))))..))))..))))..))))..))... (-29.00)
>eca; chr1:111509436-111509357
gucgucucccacaugggucuagcgguuaggauuccugguuuucacccaggcggcccgggUUCGACUCCCGGUGUGGGAAGa
.....(((((((((((((((.(((..((...(((.....))))))...))..))))..))))..))))..))... (-27.20)
>gga; NC_006107; chr20:992599-992673
ucccacaugggucuagcgguuaggauuccugguuuucacccaggcggcccgggUUCGACUCCCGGUGUGGGAAGac
(((((((((((((((.(((..((...(((.....))))))...))..))))..))))..))))..))))..))... (-27.10)

```

28

```

>bta-un28 [+] chr4:106953575-106953673
ggcuaccacuccagauuucGUGGACUCCCGGUGAGCUCAGCUgguaaagaauccgcuugcaacgugggaauacuagauuccgcuuggggaa
.....(((.(((((((((((.(((..((...(((.....))))))...))..))))..))))..))))..))))..))... (-30.60)

```

29

```
>bta-un29 [+] chr3:8630334-8630435
cgccggggcucgcgcgcgucgggucagccagggcgagcggccacgcgccagccagggcccgccGUCAGGAUGGCCGAGCGGUCUaaggcg
((((..((((.....(((((((.....(((((((.....(((((((.....(((((((.....(((((((.....(((((((.....(((((((.....)))))))))..)))
(-43.80)
>hsa; NC_000001; chr1:161418695-161418767; 161426076-161426148; 161433486-161433558;
161440867-161440939; 161411277-161411349
cgcgccggggucagccaugccagcggcgagcgccccggcgcgccGUCAGGAUGGCCGAGCGGUCUaaggcg
..(((((((.....(((((((.....(((((((.....(((((((.....)))))))))..)))
(-33.70)
>mmu; NC_000067; chr1:172996069-172996141;173003704-173003776;173011318-173011390
ggcgccgggacgccugcgagggcgagugagcuggagcccaaccgccGUCAGGAUGGCCGAGCGGUCUaaggcg
((.....(((((((.....(((((((.....)))))))))..)))
(-29.20)
>rno; NC_005112; chr13:86914705-86914782; 86934528-86934605;86956756-86956833
cgccgggucgccggucgccugcgagggcgagcgggucacgccccagaccugcuGUCAGGAUGGCCGAGCGGUCUaaggcg
((((..(((((((.....(((((((.....)))))))))..)))
(-38.30)
>cfa; NC_006620; chr38:24093788-24093717; 24108623- 24108552
gcgcccgggucagccagggcgagcggcgggcgccccagggcccgccGUCAGGAUGGCCGAGCGGUCUaaggcg
..(((((((.....(((((((.....)))))))))..)))
(-32.20)
```
