# Supplementary material for: Characterization of bovine miRNAs by sequencing and bioinformatics analysis
Source: PubMed Central journal article supplement (PMC2761914; doi:10.1186/1471-2199-10-90), 2009-09-16
Supplement: 1471-2199-10-90-S8.pdf [file 1471-2199-10-90-S8.pdf]

**Table S7. X-linked miRNAs in bovine, mouse and human**

| Cluster | Bovine <sup>a</sup> |       |           |          |          |        | Human <sup>b</sup> |      |           |           |        | Mouse <sup>c</sup> |      |           |           |        |
|---------|---------------------|-------|-----------|----------|----------|--------|--------------------|------|-----------|-----------|--------|--------------------|------|-----------|-----------|--------|
|         | pre-miRNA           | Count | Chr./ Co. | Start    | End      | strand | pre-miRNA          | Chr. | Start     | End       | strand | pre-miRNA          | Chr. | Start     | End       | strand |
| 1       | bta-mir-221         | 19    | X         | 61412746 | 61412855 | +      | hsa-mir-221        | X    | 45490529  | 45490638  | -      | mmu-mir-221        | X    | 18723420  | 18723514  | -      |
|         | bta-mir-222         | 5     | X         | 61412052 | 61412161 | +      | hsa-mir-222        | X    | 45491365  | 45491474  | -      | mmu-mir-222        | X    | 18724019  | 18724097  | -      |
| 2       | bta-mir-532         | 14/32 | X         | 54783137 | 54783222 | -      | hsa-mir-532        | X    | 49654494  | 49654584  | +      | mmu-mir-532        | X    | 6825528   | 6825623   | -      |
|         | bta-mir-500         | 4/7   | X         | 54769936 | 54770033 | -      | hsa-mir-500        | X    | 49659779  | 49659862  | +      | mmu-mir-500        | X    | 6814809   | 6814900   | -      |
| 3       | bta-mir-362         | 11    | X         | 54771199 | 54771297 | -      | hsa-mir-362        | X    | 49660312  | 49660376  | +      | mmu-mir-362        | X    | 6819108   | 6819172   | -      |
|         | bta-mir-660         | 1     | X         | 54767794 | 54767873 | -      | hsa-mir-660        | X    | 49664589  | 49664685  | +      | gap?               |      |           |           |        |
| 3       | bta-mir-98          | 0     | X         | 58737622 | 58737740 | -      | hsa-mir-98         | X    | 53599909  | 53600027  | -      | mmu-mir-98         | X    | 148347757 | 148347864 | +      |
|         | bta-let-7f-2        | 11.5  | X         | 58738526 | 58738608 | -      | has-let-7f-2       | X    | 53600878  | 53600960  | -      | mmu-let-7f-2       | X    | 148346889 | 148346971 | +      |
| 4       | bta-mir-1468        | 5     | X         | 58411908 | 58412004 | +      | hsa-mir-1468       | X    | 62922607  | 62922692  | -      | gap?               |      |           |           |        |
|         | bta-mir-223         | 2     | X         | 56723507 | 56723603 | -      | hsa-mir-223        | X    | 65155437  | 65155546  | +      | mmu-mir-223        | X    | 93438156  | 93438265  | +      |
| 4       | bta-mir-374b        | 14    | X         | 46943043 | 46943140 | +      | hsa-mir-374b       | X    | 73355107  | 73355178  | -      | mmu-mir-374        | X    | 100768399 | 100768493 | -      |
|         | bta-mir-545         | 0     | X         | 46871699 | 46871804 | +      | hsa-mir-545        | X    | 73423664  | 73423769  | -      | gap?               |      |           |           |        |
| 4       | bta-mir-374a        | 14    | X         | 46871549 | 46871620 | +      | hsa-mir-374a       | X    | 73423846  | 73423917  | -      | gap?               |      |           |           |        |
|         | bta-mir-361         | 1/3   | X         | 42524578 | 42524648 | +      | hsa-mir-361        | X    | 85045297  | 85045368  | -      | mmu-mir-361        | X    | 110188433 | 110188502 | -      |
| 5       | bta-mir-652         | 9     | gap       |          |          |        | hsa-mir-652        | X    | 109185213 | 109185310 | +      | mmu-mir-652        | X    | 139173543 | 139173640 | +      |
|         | bta-mir-363         | 1     | Un.004.53 | 180833   | 180906   | -      | hsa-mir-363        | X    | 133131074 | 133131148 | -      | mmu-mir-363        | X    | 50094870  | 50094944  | -      |
| 5       | bta-mir-92a-2       | 138   | Un.004.53 | 180988   | 181055   | -      | hsa-mir-92a-2      | X    | 133131234 | 133131308 | -      | mmu-mir-92a-2      | X    | 50095015  | 50095105  | -      |
|         | bta-mir-19b-2       | 3.5   | Un.004.53 | 181139   | 181221   | -      | hsa-mir-19b-2      | X    | 133131367 | 133131462 | -      | mmu-mir-19b-2      | X    | 50095160  | 50095243  | -      |
| 5       | bta-mir-20b         | 1     | Un.004.53 | 181264   | 181332   | -      | hsa-mir-20b        | X    | 133131505 | 133131573 | -      | mmu-mir-20b        | X    | 50095290  | 50095369  | -      |
|         | bta-mir-18b         | 0     | Un.004.53 | 181499   | 181573   | -      | hsa-mir-18b        | X    | 133131737 | 133131807 | -      | mmu-mir-18b        | X    | 50095508  | 50095590  | -      |
| 6       | bta-mir-106a        | 0     | Un.004.53 | 181658   | 181738   | -      | hsa-mir-106a       | X    | 133131894 | 133131974 | -      | mmu-mir-106a       | X    | 50095680  | 50095744  | -      |
|         | bta-mir-450-1       | 3     | Un.004.53 | 440487   | 440729   | -      | hsa-mir-450a-1     | X    | 133502037 | 133502127 | -      | mmu-mir-450a-1     | X    | 50401331  | 50401421  | -      |
| 6       | bta-mir-450-2       | 3     | Un.004.53 | 440638   | 441646   | -      | hsa-mir-450a-2     | X    | 133502204 | 133502303 | -      | mmu-mir-450a-2     | X    | 50401476  | 50401544  | -      |
|         | bta-mir-542         | 1     | Un.004.53 | 441550   | 440568   | -      | hsa-mir-542        | X    | 133503037 | 133503133 | -      | mmu-mir-542        | X    | 50402580  | 50402664  | -      |
| 6       | bta-mir-504         | 6     | X         | 12002347 | 12002444 | -      | hsa-mir-504        | X    | 137577538 | 137577620 | -      | mmu-mir-504        | X    | 56350835  | 56350913  | -      |
|         | bta-mir-505         | 4     | X         | 13241304 | 13241399 | +      | hsa-mir-505        | X    | 138833973 | 138834056 | -      | mmu-mir-505        | X    | 57647578  | 57647667  | -      |
| 7       | bta-mir-224         | 4     | X         | 21831345 | 21831443 | -      | hsa-mir-224        | X    | 150877706 | 150877786 | -      | mmu-mir-224        | X    | 69506370  | 69506451  | -      |
|         | bta-mir-452         | 1     | X         | 21832378 | 21832472 | -      | hsa-mir-452        | X    | 150878756 | 150878840 | -      | mmu-mir-452        | X    | 69507563  | 69507647  | -      |

X-linked miRNAs from bovine, mouse and human, were clustered if they were less than 5,000 bp apart on the same strand.

a: miRNA counts for sequences that matched two or more different precursors are split equally among them. Mature miRNAs generated from the same precursor are listed and split with "/".

b: Precursors of miRNA sorted according to the position of human miRNAs.

c: Pre-miRNAs unidentified in mouse X chromosome may be result of gaps there.
